# Supplementary material for: Association of low birth weight with cardiometabolic diseases in Swedish twins: a population-based cohort study
Source: PubMed Central journal article supplement (PMC8240562; doi:10.1136/bmjopen-2020-048030), 2021-06-28
Supplement: bmjopen-2020-048030supp001.pdf [file bmjopen-2020-048030supp001.pdf]

## Supplemental Materials

Including: Tables-10; Figure-1

**Table S1.** International Classification of Disease (ICD) code of cardiometabolic diseases

**Table S2.** The relationship between low birth weight and numbers of cardiometabolic diseases (CMDs): results from Generalized Estimating Equation

**Table S3.** The dose-dependent relationship between low birth weight and cardiometabolic disease: results from Generalized Estimating Equation

**Table S4.** Odds ratios (ORs) and 95% confidence intervals (CIs) of cardiometabolic diseases in relation to the joint exposure of lifestyle (smoking status, alcohol consumption, active physical exercise, and body mass index) and low birth weight (LBW) from Generalized Estimation Equation models

**Table S5.** Additive interaction between lifestyle (smoking status, alcohol consumption, active physical exercise, and body mass index) and low birth weight (LBW) for the risk of cardiometabolic diseases

**Table S6.** Odds ratios (ORs) and 95% confidence intervals (CIs) of birth weight in relation to CMDs by sex: results from Generalized Estimating Equation

**Table S7.** Odds ratios (ORs) and 95% confidence intervals (CIs) of birth weight in relation to CMDs in adulthood further adjusted for survival status: results from Generalized Estimating Equation models

**Table S8.** Odds ratios (ORs) and 95% confidence intervals (CIs) of birth weight in relation to cardiometabolic diseases in adulthood by excluding cardiometabolic diseases onset before screening: results from Generalized Estimating Equation (n=18301)

**Table S9.** Odds ratios (ORs) and 95% confidence intervals (CIs) of birth weight in relation to cardiometabolic diseases in adulthood by excluding data with missing values for covariate: results from Generalized Estimating Equation (n=18349)

**Table S10.** Odds ratios (ORs) and 95% confidence intervals (CIs) of low birth weight (LBW) in relation to cardiometabolic diseases in adulthood stratified by consistency of birth weight: results from Generalized Estimating Equation

**Figure S1.** Flow chart of the study population

**Table S1.** International Classification of Disease (ICD) code of cardiometabolic diseases

| Cardiometabolic diseases | ICD-7   | ICD-8   | ICD-9   | ICD-10       |
|--------------------------|---------|---------|---------|--------------|
| Coronary heart disease   | 420     | 410-414 | 410-414 | I20-I25      |
| Heart failure            | 434     | 427     | 428     | I50          |
| Ischemic stroke          | 332-334 | 432-438 | 433-437 | I63-I68, G47 |
| Hemorrhagic stroke       | 330-331 | 430-431 | 430-432 | I60-I62      |
| Type 2 diabetes mellitus | 260     | 250     | 250     | E11-E14      |

**Table S2.** The relationship between low birth weight and numbers of cardiometabolic diseases (CMDs): results from Generalized Estimating Equation

| CMDs status        | No. of participants | No. of cases | Low birth weight             |                              |
|--------------------|---------------------|--------------|------------------------------|------------------------------|
|                    |                     |              | Basic-adjusted OR (95% CI) * | Multi-adjusted OR (95% CI) † |
| No                 | 14444               | 2575         | Reference                    | Reference                    |
| Any one            | 5335                | 1423         | 1.43 (1.31-1.55)             | 1.37 (1.25-1.50)             |
| Only one           | 3932                | 989          | 1.32 (1.21-1.45)             | 1.28 (1.17-1.41)             |
| Any two            | 1174                | 355          | 1.56 (1.36-1.80)             | 1.48 (1.28-1.72)             |
| Any three or more  | 229                 | 79           | 1.94 (1.47-2.56)             | 1.82 (1.37-2.42)             |
| <i>P for trend</i> |                     |              | <0.001                       | <0.001                       |

\* Adjusted for age, sex, and education.

† Adjusted for age, sex, education, body mass index, smoking, alcohol consumption, marital status, physical exercise, and hypertension.

**Table S3.** The dose-dependent relationship between low birth weight and cardiometabolic disease: results from Generalized Estimating Equation

| Birth weight       | No. of Case | Basic-adjusted OR (95% CI) * | Multi-adjusted OR (95% CI) † |
|--------------------|-------------|------------------------------|------------------------------|
| Continuous         |             | 0.83 (0.79-0.88)             | 0.84 (0.80-0.89)             |
| Categorical        |             |                              |                              |
| <1.7               | 622         | 1.54 (1.36-1.74)             | 1.45 (1.28-1.66)             |
| 1.7-2.0kg          | 801         | 1.35 (1.22-1.49)             | 1.32 (1.18-1.47)             |
| ≥2.0kg             | 3912        | Reference                    | Reference                    |
| <i>P for trend</i> |             | <0.001                       | <0.001                       |

\* Adjusted for age, sex, and education.

† Adjusted for age, sex, education, body mass index, smoking, alcohol consumption, marital status, physical exercise, and hypertension.

**Table S4.** Odds ratios (ORs) and 95% confidence intervals (CIs) of cardiometabolic diseases in relation to the joint exposure of lifestyle (smoking status, alcohol consumption, active physical exercise, and body mass index) and low birth weight (LBW) from Generalized Estimation Equation models

| Joint exposure  |     | No. of subjects * | Cases | Cardiometabolic diseases     |                              |
|-----------------|-----|-------------------|-------|------------------------------|------------------------------|
| Lifestyle index | LBW |                   |       | Basic-adjusted OR (95% CI) † | Multi-adjusted OR (95% CI) ‡ |
| Favorable       | No  | 2533              | 314   | Reference                    | Reference                    |
| Intermediate    | No  | 9751              | 1795  | 1.65 (1.44-1.87)             | 1.52 (1.32-1.74)             |
| Unfavorable     | No  | 2274              | 620   | 2.90 (2.47-3.40)             | 2.39 (2.02-2.83)             |
| Favorable       | Yes | 570               | 102   | 1.32 (1.03-1.70)             | 1.25 (0.96-1.62)             |
| Intermediate    | Yes | 2362              | 610   | 2.18 (1.86-2.54)             | 1.94 (1.64-2.28)             |
| Unfavorable     | Yes | 541               | 196   | 3.89 (3.08-4.90)             | 3.47 (2.72-4.43)             |

\* 1748 cases before Screening Across the Lifespan Twin study survey were excluded.

† Adjusted for age, sex, education.

‡ Adjusted for age, sex, education, marital status, and hypertension.

**Table S5.** Additive interaction between lifestyle (smoking status, alcohol consumption, active physical exercise, and body mass index) and low birth weight (LBW) for the risk of cardiometabolic diseases

| Joint exposure         |     | No. of subjects * | Cases | Cardiometabolic diseases     |                              |
|------------------------|-----|-------------------|-------|------------------------------|------------------------------|
| Lifestyle index        | LBW |                   |       | Basic-adjusted OR (95% CI) † | Multi-adjusted OR (95% CI) ‡ |
| Favorable/Intermediate | No  | 12284             | 2109  | Reference                    | Reference                    |
| Unfavorable            | No  | 2274              | 620   | 1.91 (1.70-2.14)             | 1.68 (1.49-1.90)             |
| Favorable/Intermediate | Yes | 2932              | 712   | 1.33 (1.20-1.47)             | 1.28 (1.14-1.42)             |
| Unfavorable            | Yes | 541               | 196   | 2.56 (2.09-3.15)             | 2.44 (1.97-3.03)             |

\* 1748 cases before Screening Across the Lifespan Twin study survey were exclude.

† Adjusted for age, sex, education.

‡ Adjusted for age, sex, education, marital status, and hypertension.

Measures of additive interaction for cardiometabolic diseases:

Relative excess risk due to interaction: 0.485, 95%CI: -0.044–1.014,  $P=0.07$ ;

Attributable proportion due to interaction: 0.199, 95%CI: 0.016–0.381,  $P=0.03$ ;

Synergy index: 1.506, 95% CI: 1.001–2.267,  $P<0.001$ .

**Table S6.** Odds ratios (ORs) and 95% confidence intervals (CIs) of birth weight in relation to CMDs by sex: results from Generalized Estimating Equation

| Birth weight (kg) | No. of Cases | OR (95% CI) *    | OR (95% CI) †    |
|-------------------|--------------|------------------|------------------|
| <b>Male</b>       |              |                  |                  |
| <2.0              | 564          | 1.39 (1.20-1.61) | 1.44 (1.23-1.69) |
| 2.0-3.0           | 1050         | Reference        | Reference        |
| >3.0              | 642          | 1.06 (0.93-1.21) | 1.07 (0.93-1.23) |
| <b>Female</b>     |              |                  |                  |
| <2.0              | 859          | 1.47 (1.32-1.63) | 1.36 (1.21-1.52) |
| 2.0-3.0           | 1747         | Reference        | Reference        |
| >3.0              | 473          | 1.06 (0.94-1.19) | 1.04 (0.91-1.19) |

\* Adjusted for age, sex, and education.

† Adjusted for age, sex, education, body mass index, smoking, alcohol consumption, marital status, physical exercise, and hypertension.

**Table S7.** Odds ratios (ORs) and 95% confidence intervals (CIs) of birth weight in relation to CMDs in adulthood further adjusted for survival status: results from Generalized Estimating Equation models

| Birth weight (kg) | No. of Cases | OR (95% CI) *    |
|-------------------|--------------|------------------|
| <2.0              | 1423         | 1.38 (1.26-1.52) |
| 2.0-3.0           | 2797         | Reference        |
| >3.0              | 1115         | 1.05 (0.95-1.16) |

\* Adjusted for age, sex, education, body mass index, smoking, alcohol consumption, marital status, physical exercise, hypertension, and death.



**Table S8.** Odds ratios (ORs) and 95% confidence intervals (CIs) of birth weight in relation to cardiometabolic diseases in adulthood by excluding cardiometabolic diseases onset before screening: results from Generalized Estimating Equation (n=18301)

| Birth weight (kg) | No. of Cases | OR (95% CI) *    | OR (95% CI) †    |
|-------------------|--------------|------------------|------------------|
| <2.0              | 908          | 1.34 (1.22-1.48) | 1.30 (1.17-1.45) |
| 2.0-3.0           | 1969         | Reference        | Reference        |
| >3.0              | 760          | 1.03 (0.93-1.13) | 1.02 (0.92-1.14) |

\* Adjusted for age, sex, and education.

† Adjusted for age, sex, education, body mass index, smoking, alcohol consumption, marital status, physical exercise, and hypertension.

**Table S9.** Odds ratios (ORs) and 95% confidence intervals (CIs) of birth weight in relation to cardiometabolic diseases in adulthood by excluding data with missing values for covariate: results from Generalized Estimating Equation (n=18349)

| Birth weight (kg) | No. of Cases | OR (95% CI) *    | OR (95% CI) †    |
|-------------------|--------------|------------------|------------------|
| <2.0              | 1184         | 1.49 (1.36-1.63) | 1.43 (1.30-1.58) |
| 2.0-3.0           | 2359         | Reference        | Reference        |
| >3.0              | 937          | 1.05 (0.96-1.15) | 1.03 (0.93-1.14) |

\* Adjusted for age, sex, and education.

† Adjusted for age, sex, education, body mass index, smoking, alcohol consumption, marital status, physical exercise, and hypertension.

**Table S10.** Odds ratios (ORs) and 95% confidence intervals (CIs) of low birth weight (LBW) in relation to cardiometabolic diseases in adulthood stratified by consistency of birth weight: results from Generalized Estimating Equation

| Birth weight (kg)  | No. of Cases | OR (95% CI) *    | OR (95% CI) †    |
|--------------------|--------------|------------------|------------------|
| <b>Concordance</b> |              |                  |                  |
| LBW                | 347          | 1.53 (1.29-1.82) | 1.47 (1.23-1.76) |
| Non-LBW            | 1370         | Reference        | Reference        |
| <b>Discordance</b> |              |                  |                  |
| LBW                | 334          | 1.16 (0.97-1.39) | 1.13 (0.93-1.39) |
| Non-LBW            | 310          | Reference        | Reference        |

\* Adjusted for age, sex, and education.

† Adjusted for age, sex, education, body mass index, smoking, alcohol consumption, marital status, physical exercise, and hypertension.

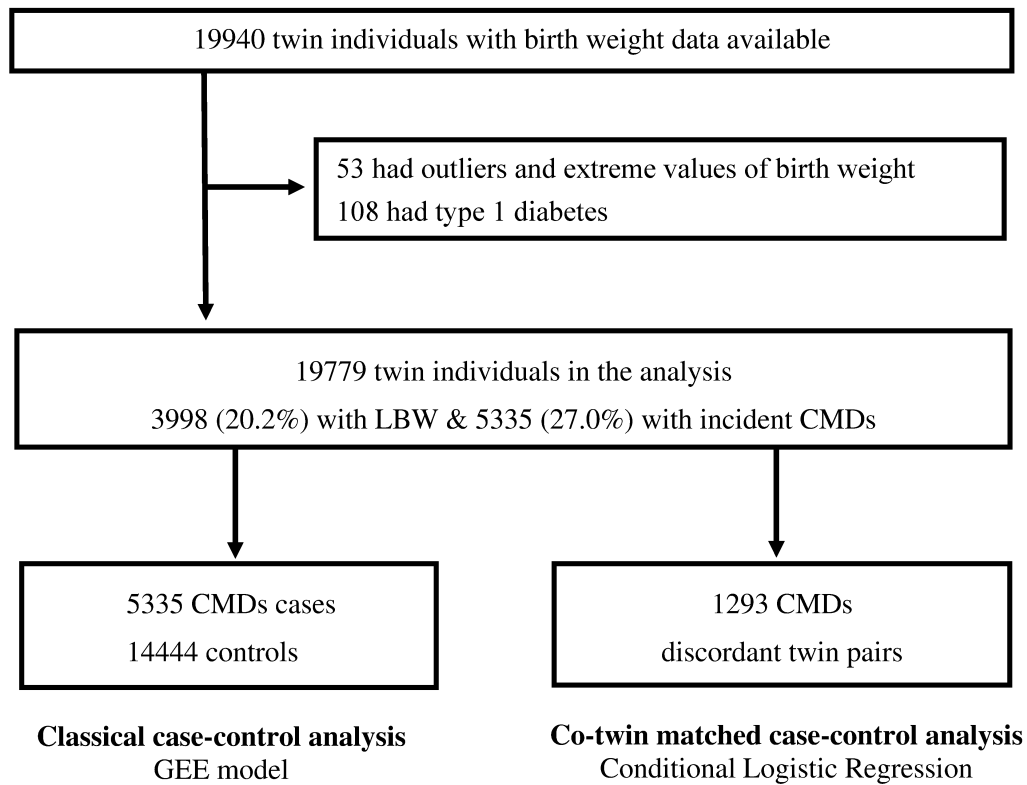

**Figure S1.** Flow chart of the study population

Abbreviations: LBW, low birth weight; CMDs, cardiometabolic diseases; GEE, generalized estimating equation.
